# Supplementary material for: Neural Activity Correlates With Behavior Effects of Anti-Seizure Drugs Efficacy Using the Zebrafish Pentylenetetrazol Seizure Model
Source: PubMed Central journal article supplement (PMC9041662; doi:10.3389/fphar.2022.836573), 2022-04-12
Supplement: Table1.pdf [file Table1.pdf]

*Supplemental Data*

*Milder, Zybura, Cummins and Marrs*

*Neural Activity Correlates with Behavior Effects of Anti-Seizure Drugs Efficacy Using the Zebrafish Pentylentetrazol Seizure Model*

**Table S1. Statistical Results for behavioral profile of zebrafish larvae exposed to PTZ**

The table displays the results of both the two-way ANOVA (Fig 1A) and one-way ANOVA (Fig 1B) performed for Figures 1 (A and B) and the resulting post-hoc Tukey comparisons and accompanying p-values for groups marked for significance within the Figure 1 graphs.

**Table S1: Statistical Results for PTZ Assay**

| Two-way ANOVA table results            |                  |                                     |                  |
|----------------------------------------|------------------|-------------------------------------|------------------|
|                                        | DF               | F (DFn, DFd)                        | P value          |
| <b>Time x Column Factor</b>            | 20               | F (20, 1725) = 14.82                | P<0.0001         |
| <b>Time</b>                            | 5                | F (3.149, 1086) = 47.64             | P<0.0001         |
| <b>Column Factor</b>                   | 4                | F (4, 345) = 58.51                  | P<0.0001         |
| <b>Subject</b>                         | 345              | F (345, 1725) = 3.008               | P<0.0001         |
| <b>Residual</b>                        | 1725             |                                     |                  |
| Two-way ANOVA Tukey's Post-hoc Results |                  |                                     |                  |
| Tukey's multiple comparisons test      | Adjusted P Value | Tukey's multiple comparisons test   | Adjusted P Value |
| <b>Time period: 0 -15 minutes</b>      |                  | <b>Time period: 45 - 60 minutes</b> |                  |
| EM vs. 5 mM PTZ                        | 0.9161           | EM vs. 5 mM PTZ                     | 0.0027           |
| EM vs. 10 mM PTZ                       | <0.0001          | EM vs. 10 mM PTZ                    | <0.0001          |
| EM vs. 20 mM PTZ                       | <0.0001          | EM vs. 20 mM PTZ                    | 0.67             |
| EM vs. 40 mM PTZ                       | <0.0001          | EM vs. 40 mM PTZ                    | 0.1085           |
| <b>Time period: 15 - 30 minutes</b>    |                  | <b>Time period: 60 - 75 minutes</b> |                  |
| EM vs. 5 mM PTZ                        | 0.0133           | EM vs. 5 mM PTZ                     | 0.0157           |
| EM vs. 10 mM PTZ                       | <0.0001          | EM vs. 10 mM PTZ                    | <0.0001          |
| EM vs. 20 mM PTZ                       | <0.0001          | EM vs. 20 mM PTZ                    | 0.9048           |
| EM vs. 40 mM PTZ                       | 0.0101           | EM vs. 40 mM PTZ                    | 0.0007           |
| <b>Time period: 30 - 45 minutes</b>    |                  | <b>Time period: 75 - 90 minutes</b> |                  |
| EM vs. 5 mM PTZ                        | 0.0932           | EM vs. 5 mM PTZ                     | 0.0778           |
| EM vs. 10 mM PTZ                       | <0.0001          | EM vs. 10 mM PTZ                    | <0.0001          |
| EM vs. 20 mM PTZ                       | 0.1367           | EM vs. 20 mM PTZ                    | 0.2259           |
| One-way ANOVA table results            |                  |                                     |                  |
|                                        | DF               | F (DFn, DFd)                        | P value          |
| <b>Treatment (between columns)</b>     | 4                | F (4, 220) = 34.91                  | P<0.0001         |
| <b>Residual (within columns)</b>       | 220              |                                     |                  |
| <b>Total</b>                           | 224              |                                     |                  |
| One-way ANOVA Tukey's Post-hoc Results |                  |                                     |                  |
| Tukey's multiple comparisons test      | Adjusted P Value |                                     |                  |
| EM vs. 5 mM PTZ                        | 0.3342           |                                     |                  |
| EM vs. 10 mM PTZ                       | <0.0001          |                                     |                  |
| EM vs. 20 mM PTZ                       | <0.0001          |                                     |                  |
| EM vs. 40 mM PTZ                       | 0.9133           |                                     |                  |
