# Supplementary material for: Neural Activity Correlates With Behavior Effects of Anti-Seizure Drugs Efficacy Using the Zebrafish Pentylenetetrazol Seizure Model
Source: PubMed Central journal article supplement (PMC9041662; doi:10.3389/fphar.2022.836573), 2022-04-12
Supplement: Table2.pdf [file Table2.pdf]

*Supplemental Data*

*Milder, Zybura, Cummins and Marrs*

*Neural Activity Correlates with Behavior Effects of Anti-Seizure Drugs Efficacy Using the Zebrafish Pentylenetetrazol Seizure Model*

**Table S2. Statistical Results for behavioral profile of zebrafish larvae exposed to carbamazepine**

The table displays the results of both the two-way ANOVA (Fig 2A) and one-way ANOVA (Fig 2B) performed for Figures 2 (A and B) and the resulting post-hoc Tukey comparisons and accompanying p-values for groups marked for significance within the Figure 2 graphs.

**Table S2: Statistical Results for CBZ Assay**

| <b>Two-way ANOVA table results</b>                  |                         |                                                     |                         |
|-----------------------------------------------------|-------------------------|-----------------------------------------------------|-------------------------|
|                                                     | <b>DF</b>               | <b>F (DFn, DFd)</b>                                 | <b>P value</b>          |
| <b>Time x Column Factor</b>                         | 30                      | F (30, 2625) = 5.171                                | P<0.0001                |
| <b>Time</b>                                         | 5                       | F (3, 761, 1975) = 14.03                            | P<0.0001                |
| <b>Column Factor</b>                                | 6                       | F (6, 525) = 51.76                                  | P<0.0001                |
| <b>Subject</b>                                      | 525                     | F (525, 2625) = 3.701                               | P<0.0001                |
| <b>Residual</b>                                     | 2625                    |                                                     |                         |
| <b>Two-way ANOVA Tukey's Post-hoc Results</b>       |                         |                                                     |                         |
| <b>Tukey's multiple comparisons test</b>            | <b>Adjusted P Value</b> | <b>Tukey's multiple comparisons test</b>            | <b>Adjusted P Value</b> |
| <b>Time period: 0 -15 minutes</b>                   |                         | <b>Time period: 45 - 60 minutes</b>                 |                         |
| EM vs. 0.1 % DMSO                                   | >0.9999                 | EM vs. 0.1 % DMSO                                   | >0.9999                 |
| EM vs. 10 mM PTZ                                    | 0.0263                  | EM vs. 10 mM PTZ                                    | <0.0001                 |
| EM vs. 100 µM CBZ - pretreatment                    | <0.0001                 | EM vs. 100 µM CBZ - pretreatment                    | 0.0109                  |
| EM vs. 100 µM CBZ acute                             | 0.0022                  | EM vs. 100 µM CBZ acute                             | <0.0001                 |
| EM vs. 10 mM PTZ / 100 µM CBZ - pretreatment        | 0.1683                  | EM vs. 10 mM PTZ / 100 µM CBZ - pretreatment        | 0.1259                  |
| EM vs. 10 mM PTZ / 100 µM CBZ acute                 | 0.4155                  | EM vs. 10 mM PTZ / 100 µM CBZ acute                 | 0.0014                  |
| 10 mM PTZ vs. 10 mM PTZ / 100 µM CBZ - pretreatment | 0.9963                  | 10 mM PTZ vs. 10 mM PTZ / 100 µM CBZ - pretreatment | <0.0001                 |
| 10 mM PTZ vs. 10 mM PTZ / 100 µM CBZ acute          | 0.8847                  | 10 mM PTZ vs. 10 mM PTZ / 100 µM CBZ acute          | 0.0023                  |
| <b>Time period: 15 - 30 minutes</b>                 |                         | <b>Time period: 60 - 75 minutes</b>                 |                         |
| EM vs. 0.1 % DMSO                                   | 0.9996                  | EM vs. 0.1 % DMSO                                   | 0.9628                  |
| EM vs. 10 mM PTZ                                    | 0.0036                  | EM vs. 10 mM PTZ                                    | <0.0001                 |
| EM vs. 100 µM CBZ - pretreatment                    | <0.0001                 | EM vs. 100 µM CBZ - pretreatment                    | 0.0016                  |
| EM vs. 100 µM CBZ acute                             | <0.0001                 | EM vs. 100 µM CBZ acute                             | <0.0001                 |
| EM vs. 10 mM PTZ / 100 µM CBZ - pretreatment        | 0.0136                  | EM vs. Group F                                      | 0.3976                  |
| EM vs. 10 mM PTZ / 100 µM CBZ acute                 | 0.9278                  | EM vs. 10 mM PTZ / 100 µM CBZ acute                 | 0.001                   |
| 10 mM PTZ vs. 10 mM PTZ / 100 µM CBZ - pretreatment | 0.4954                  | 10 mM PTZ vs. Group F                               | 0.0098                  |
| 10 mM PTZ vs. 10 mM PTZ / 100 µM CBZ acute          | 0.0576                  | 10 mM PTZ vs. 10 mM PTZ / 100 µM CBZ acute          | 0.4587                  |
| <b>Time period: 30 - 45 minutes</b>                 |                         | <b>Time period: 75 - 90 minutes</b>                 |                         |
| EM vs. 0.1 % DMSO                                   | 0.8612                  | EM vs. 0.1 % DMSO                                   | >0.9999                 |
| EM vs. 10 mM PTZ                                    | <0.0001                 | EM vs. 10 mM PTZ                                    | <0.0001                 |
| EM vs. 100 µM CBZ - pretreatment                    | <0.0001                 | EM vs. 100 µM CBZ - pretreatment                    | <0.0001                 |
| EM vs. 100 µM CBZ acute                             | <0.0001                 | EM vs. 100 µM CBZ acute                             | <0.0001                 |
| EM vs. 10 mM PTZ / 100 µM CBZ - pretreatment        | 0.0828                  | EM vs. Group F                                      | 0.413                   |
| EM vs. 10 mM PTZ / 100 µM CBZ acute                 | 0.0159                  | EM vs. 10 mM PTZ / 100 µM CBZ acute                 | 0.0015                  |
| 10 mM PTZ vs. 10 mM PTZ / 100 µM CBZ - pretreatment | 0.0003                  | 10 mM PTZ vs. Group F                               | 0.203                   |
| 10 mM PTZ vs. 10 mM PTZ / 100 µM CBZ acute          | 0.0027                  | 10 mM PTZ vs. 10 mM PTZ / 100 µM CBZ acute          | 0.9853                  |
| <b>One-way ANOVA table results</b>                  |                         |                                                     |                         |
|                                                     | <b>DF</b>               | <b>F (DFn, DFd)</b>                                 | <b>P value</b>          |
| <b>Treatment (between columns)</b>                  | DF                      | <b>F (DFn, DFd)</b>                                 | <b>P value</b>          |
| <b>Residual (within columns)</b>                    | 6                       | F (6, 525) = 51.76                                  | P<0.0001                |
| <b>Total</b>                                        | 525                     |                                                     |                         |
| <b>One-way ANOVA Tukey's Post-hoc Results</b>       |                         |                                                     |                         |
| <b>Tukey's multiple comparisons test</b>            | <b>Adjusted P Value</b> |                                                     |                         |
| EM vs. 0.1 % DMSO                                   | >0.9999                 |                                                     |                         |
| EM vs. 10 mM PTZ                                    | <0.0001                 |                                                     |                         |
| EM vs. 100 µM CBZ - pretreatment                    | 0.0031                  |                                                     |                         |
| EM vs. 100 µM CBZ acute                             | 0.0005                  |                                                     |                         |
| EM vs. 10 mM PTZ / 100 µM CBZ - pretreatment        | 0.0155                  |                                                     |                         |
| EM vs. 10 mM PTZ / 100 µM CBZ acute                 | <0.0001                 |                                                     |                         |
| 10 mM PTZ vs. 10 mM PTZ / 100 µM CBZ - pretreatment | <0.0001                 |                                                     |                         |
| 10 mM PTZ vs. 10 mM PTZ / 100 µM CBZ acute          | <0.0001                 |                                                     |                         |
