# Supplementary material for: Neural Activity Correlates With Behavior Effects of Anti-Seizure Drugs Efficacy Using the Zebrafish Pentylenetetrazol Seizure Model
Source: PubMed Central journal article supplement (PMC9041662; doi:10.3389/fphar.2022.836573), 2022-04-12
Supplement: Table3.pdf [file Table3.pdf]

*Supplemental Data*

*Milder, Zybura, Cummins and Marrs*

*Neural Activity Correlates with Behavior Effects of Anti-Seizure Drugs Efficacy Using the Zebrafish Pentylentetrazol Seizure Model*

**Table S3. Statistical Results for behavioral profile of zebrafish larvae exposed to lamotrigine**

The table displays the results of both the two-way ANOVA (Fig 3A) and one-way ANOVA (Fig 3B) performed for Figures 3 (A and B) and the resulting post-hoc Tukey comparisons and accompanying p-values for groups marked for significance within the Figure 3 graphs.

**Table S3: Statistical Results for LTG Assay**

| Two-way ANOVA table results                         |                  |                                                     |                  |
|-----------------------------------------------------|------------------|-----------------------------------------------------|------------------|
|                                                     | DF               | F (DFn, DFd)                                        | P value          |
| <b>Time x Column Factor</b>                         | 30               | F (30, 2625) = 8.983                                | P<0.0001         |
| <b>Time</b>                                         | 5                | F (2.762, 1450) = 0.7716                            | P=0.5002         |
| <b>Column Factor</b>                                | 6                | F (6, 525) = 29.19                                  | P<0.0001         |
| <b>Subject</b>                                      | 525              | F (525, 2625) = 5.437                               | P<0.0001         |
| <b>Residual</b>                                     | 2625             |                                                     |                  |
| Two-way ANOVA Tukey's Post-hoc Results              |                  |                                                     |                  |
| Tukey's multiple comparisons test                   | Adjusted P Value | Tukey's multiple comparisons test                   | Adjusted P Value |
| <b>Time period: 0 -15 minutes</b>                   |                  | <b>Time period: 45 - 60 minutes</b>                 |                  |
| EM vs. 0.1 % DMSO                                   | 0.863            | EM vs. 0.1 % DMSO                                   | 0.9335           |
| EM vs. 10 mM PTZ                                    | 0.0138           | EM vs. 10 mM PTZ                                    | <0.0001          |
| EM vs. 100 µM LTG - pretreatment                    | >0.9999          | EM vs. 100 µM LTG - pretreatment                    | 0.9886           |
| EM vs. 100 µM LTG acute                             | 0.5665           | EM vs. 100 µM LTG acute                             | >0.9999          |
| EM vs. 100 µM LTG - pretreatment                    | 0.6537           | EM vs. 100 µM LTG - pretreatment                    | 0.0001           |
| EM vs. 10 mM PTZ / 100 µM LTG acute                 | 0.0325           | EM vs. 10 mM PTZ / 100 µM LTG acute                 | 0.0006           |
| 10 mM PTZ vs. 10 mM PTZ / 100 µM LTG - pretreatment | 0.2824           | 10 mM PTZ vs. 10 mM PTZ / 100 µM LTG - pretreatment | 0.1745           |
| 10 mM PTZ vs. 10 mM PTZ / 100 µM LTG acute          | >0.9999          | 10 mM PTZ vs. 10 mM PTZ / 100 µM LTG acute          | 0.7238           |
| <b>Time period: 15 - 30 minutes</b>                 |                  | <b>Time period: 60 - 75 minutes</b>                 |                  |
| EM vs. 0.1 % DMSO                                   | 0.8197           | EM vs. 0.1 % DMSO                                   | 0.945            |
| EM vs. 10 mM PTZ                                    | 0.0007           | EM vs. 10 mM PTZ                                    | <0.0001          |
| EM vs. 100 µM LTG - pretreatment                    | 0.7785           | EM vs. 100 µM LTG - pretreatment                    | 0.9127           |
| EM vs. 100 µM LTG acute                             | 0.9935           | EM vs. 100 µM LTG acute                             | >0.9999          |
| EM vs. 100 µM LTG - pretreatment                    | <0.0001          | EM vs. 100 µM LTG - pretreatment                    | 0.0026           |
| EM vs. 10 mM PTZ / 100 µM LTG acute                 | 0.0741           | EM vs. 10 mM PTZ / 100 µM LTG acute                 | 0.0054           |
| 10 mM PTZ vs. 10 mM PTZ / 100 µM LTG - pretreatment | 0.148            | 10 mM PTZ vs. 10 mM PTZ / 100 µM LTG - pretreatment | <0.0001          |
| 10 mM PTZ vs. 10 mM PTZ / 100 µM LTG acute          | 0.0619           | 10 mM PTZ vs. 10 mM PTZ / 100 µM LTG acute          | >0.9999          |
| <b>Time period: 30 - 45 minutes</b>                 |                  | <b>Time period: 75 - 90 minutes</b>                 |                  |
| EM vs. 0.1 % DMSO                                   | 0.9983           | EM vs. 0.1 % DMSO                                   | 0.993            |
| EM vs. 10 mM PTZ                                    | <0.0001          | EM vs. 10 mM PTZ                                    | <0.0001          |
| EM vs. 100 µM LTG - pretreatment                    | 0.858            | EM vs. 100 µM LTG - pretreatment                    | 0.1641           |
| EM vs. 100 µM LTG acute                             | 0.9999           | EM vs. 100 µM LTG acute                             | >0.9999          |
| EM vs. 100 µM LTG - pretreatment                    | <0.0001          | EM vs. 100 µM LTG - pretreatment                    | 0.1349           |
| EM vs. 10 mM PTZ / 100 µM LTG acute                 | 0.0002           | EM vs. 10 mM PTZ / 100 µM LTG acute                 | 0.0001           |
| 10 mM PTZ vs. 10 mM PTZ / 100 µM LTG - pretreatment | 0.9989           | 10 mM PTZ vs. 10 mM PTZ / 100 µM LTG - pretreatment | 0.0008           |
| 10 mM PTZ vs. 10 mM PTZ / 100 µM LTG acute          | 0.5785           | 10 mM PTZ vs. 10 mM PTZ / 100 µM LTG acute          | 0.9649           |
| One-way ANOVA table results                         |                  |                                                     |                  |
|                                                     | DF               | F (DFn, DFd)                                        | P value          |
| <b>Treatment (between columns)</b>                  | DF               | F (DFn, DFd)                                        | P value          |
| <b>Residual (within columns)</b>                    | 6                | F (6, 525) = 29.19                                  | P<0.0001         |
| <b>Total</b>                                        | 525              |                                                     |                  |
| One-way ANOVA Tukey's Post-hoc Results              |                  |                                                     |                  |
| Tukey's multiple comparisons test                   | Adjusted P Value |                                                     |                  |
| EM vs. 0.1 % DMSO                                   | 0.9849           |                                                     |                  |
| EM vs. 10 mM PTZ                                    | <0.0001          |                                                     |                  |
| EM vs. 100 µM LTG - pretreatment                    | 0.9849           |                                                     |                  |
| EM vs. 100 µM LTG acute                             | 0.9997           |                                                     |                  |
| EM vs. 100 µM LTG - pretreatment                    | <0.0001          |                                                     |                  |
| EM vs. 10 mM PTZ / 100 µM LTG acute                 | <0.0001          |                                                     |                  |
| 10 mM PTZ vs. 10 mM PTZ / 100 µM LTG - pretreatment | 0.0959           |                                                     |                  |
| 10 mM PTZ vs. 10 mM PTZ / 100 µM LTG acute          | 0.9111           |                                                     |                  |
