# Supplementary material for: Neural Activity Correlates With Behavior Effects of Anti-Seizure Drugs Efficacy Using the Zebrafish Pentylenetetrazol Seizure Model
Source: PubMed Central journal article supplement (PMC9041662; doi:10.3389/fphar.2022.836573), 2022-04-12
Supplement: Table4.pdf [file Table4.pdf]

*Supplemental Data*

*Milder, Zybura, Cummins and Marrs*

*Neural Activity Correlates with Behavior Effects of Anti-Seizure Drugs Efficacy Using the Zebrafish Pentylentetrazol Seizure Model*

**Table S4. Statistical Results for behavioral profile of zebrafish larvae exposed to topiramate**

The table displays the results of both the two-way ANOVA (Fig 4A) and one-way ANOVA (Fig 4B) performed for Figures 4 (A and B) and the resulting post-hoc Tukey comparisons and accompanying p-values for groups marked for significance within the Figure 4 graphs.

**Table S4: Statistical Results for TPR Assay**

| Two-way ANOVA table results                         |                  |                                                     |                  |
|-----------------------------------------------------|------------------|-----------------------------------------------------|------------------|
|                                                     | DF               | F (DFn, DFd)                                        | P value          |
| <b>Time x Column Factor</b>                         | 30               | F (30, 3150) = 6.747                                | P<0.0001         |
| <b>Time</b>                                         | 5                | F (3, 798, 2393) = 16.45                            | P<0.0001         |
| <b>Column Factor</b>                                | 6                | F (6, 630) = 86.77                                  | P<0.0001         |
| <b>Subject</b>                                      | 630              | F (630, 3150) = 2.710                               | P<0.0001         |
| <b>Residual</b>                                     | 3150             |                                                     |                  |
| Two-way ANOVA Tukey's Post-hoc Results              |                  |                                                     |                  |
| Tukey's multiple comparisons test                   | Adjusted P Value | Tukey's multiple comparisons test                   | Adjusted P Value |
| <b>Time period: 0 -15 minutes</b>                   |                  | <b>Time period: 45 - 60 minutes</b>                 |                  |
| EM vs. 0.1 % DMSO                                   | 0.9846           | EM vs. 0.1 % DMSO                                   | 0.9978           |
| EM vs. 10 mM PTZ                                    | 0.0052           | EM vs. 10 mM PTZ                                    | <0.0001          |
| EM vs. 200 µm TPR - pretreatment                    | 0.0121           | EM vs. 200 µm TPR - pretreatment                    | 0.9862           |
| EM vs. 200 µm TPR acute                             | 0.9901           | EM vs. 200 µm TPR acute                             | 0.0408           |
| EM vs. 200 µm TPR - pretreatment                    | >0.9999          | EM vs. 200 µm TPR - pretreatment                    | <0.0001          |
| EM vs. 10 mM PTZ / 200 µm TPR acute                 | 0.0022           | EM vs. 10 mM PTZ / 200 µm TPR acute                 | <0.0001          |
| 10 mM PTZ vs. 10 mM PTZ / 200 µm TPR - pretreatment | 0.033            | 10 mM PTZ vs. 10 mM PTZ / 200 µm TPR - pretreatment | 0.6469           |
| 10 mM PTZ vs. 10 mM PTZ / 200 µm TPR acute          | <0.0001          | 10 mM PTZ vs. 10 mM PTZ / 200 µm TPR acute          | 0.0014           |
| <b>Time period: 15 - 30 minutes</b>                 |                  | <b>Time period: 60 - 75 minutes</b>                 |                  |
| EM vs. 0.1 % DMSO                                   | 0.5761           | EM vs. 0.1 % DMSO                                   | 0.7181           |
| EM vs. 10 mM PTZ                                    | <0.0001          | EM vs. 10 mM PTZ                                    | <0.0001          |
| EM vs. 200 µm TPR - pretreatment                    | 0.7773           | EM vs. 200 µm TPR - pretreatment                    | >0.9999          |
| EM vs. 200 µm TPR acute                             | 0.0256           | EM vs. 200 µm TPR acute                             | 0.1545           |
| EM vs. 200 µm TPR - pretreatment                    | <0.0001          | EM vs. 200 µm TPR - pretreatment                    | <0.0001          |
| EM vs. 10 mM PTZ / 200 µm TPR acute                 | <0.0001          | EM vs. 10 mM PTZ / 200 µm TPR acute                 | 0.0007           |
| 10 mM PTZ vs. 10 mM PTZ / 200 µm TPR - pretreatment | 0.3473           | 10 mM PTZ vs. 10 mM PTZ / 200 µm TPR - pretreatment | 0.8316           |
| 10 mM PTZ vs. 10 mM PTZ / 200 µm TPR acute          | 0.285            | 10 mM PTZ vs. 10 mM PTZ / 200 µm TPR acute          | 0.0002           |
| <b>Time period: 30 - 45 minutes</b>                 |                  | <b>Time period: 75 - 90 minutes</b>                 |                  |
| EM vs. 0.1 % DMSO                                   | 0.9995           | EM vs. 0.1 % DMSO                                   | >0.9999          |
| EM vs. 10 mM PTZ                                    | <0.0001          | EM vs. 10 mM PTZ                                    | <0.0001          |
| EM vs. 200 µm TPR - pretreatment                    | 0.7738           | EM vs. 200 µm TPR - pretreatment                    | 0.8247           |
| EM vs. 200 µm TPR acute                             | 0.0171           | EM vs. 200 µm TPR acute                             | 0.001            |
| EM vs. 200 µm TPR - pretreatment                    | <0.0001          | EM vs. 200 µm TPR - pretreatment                    | <0.0001          |
| EM vs. 10 mM PTZ / 200 µm TPR acute                 | <0.0001          | EM vs. 10 mM PTZ / 200 µm TPR acute                 | 0.5344           |
| 10 mM PTZ vs. 10 mM PTZ / 200 µm TPR - pretreatment | 0.3762           | 10 mM PTZ vs. 10 mM PTZ / 200 µm TPR - pretreatment | 0.0871           |
| 10 mM PTZ vs. 10 mM PTZ / 200 µm TPR acute          | 0.0148           | 10 mM PTZ vs. 10 mM PTZ / 200 µm TPR acute          | 0.0002           |
| One-way ANOVA table results                         |                  |                                                     |                  |
|                                                     | DF               | F (DFn, DFd)                                        | P value          |
| <b>Treatment (between columns)</b>                  | 6                | F (DFn, DFd)                                        | P value          |
| <b>Residual (within columns)</b>                    | 35               | F (6, 35) = 28.91                                   | P<0.0001         |
| <b>Total</b>                                        | 41               |                                                     |                  |
| One-way ANOVA Tukey's Post-hoc Results              |                  |                                                     |                  |
| Tukey's multiple comparisons test                   | Adjusted P Value |                                                     |                  |
| EM vs. 0.1 % DMSO                                   | 0.998            |                                                     |                  |
| EM vs. 10 mM PTZ                                    | <0.0001          |                                                     |                  |
| EM vs. 200 µm TPR - pretreatment                    | 0.9749           |                                                     |                  |
| EM vs. 200 µm TPR acute                             | 0.9682           |                                                     |                  |
| EM vs. 200 µm TPR - pretreatment                    | <0.0001          |                                                     |                  |
| EM vs. 10 mM PTZ / 200 µm TPR acute                 | 0.002            |                                                     |                  |
| 10 mM PTZ vs. 10 mM PTZ / 200 µm TPR - pretreatment | 0.0407           |                                                     |                  |
| 10 mM PTZ vs. 10 mM PTZ / 200 µm TPR acute          | 0.0013           |                                                     |                  |
