# Supplementary material for: Neural Activity Correlates With Behavior Effects of Anti-Seizure Drugs Efficacy Using the Zebrafish Pentylenetetrazol Seizure Model
Source: PubMed Central journal article supplement (PMC9041662; doi:10.3389/fphar.2022.836573), 2022-04-12
Supplement: Table5.pdf [file Table5.pdf]

*Supplemental Data*

*Milder, Zybura, Cummins and Marrs*

*Neural Activity Correlates with Behavior Effects of Anti-Seizure Drugs Efficacy Using the Zebrafish Pentylentetrazol Seizure Model*

**Table S5. Statistical Results for behavioral profile of zebrafish larvae exposed to GS967**

The table displays the results of both the two-way ANOVA (Fig 5A) and one-way ANOVA (Fig 5B) performed for Figures 5 (A and B) and the resulting post-hoc Tukey comparisons and accompanying p-values for groups marked for significance within the Figure 5 graphs.

**Table S5: Statistical Results for GS967 Assay**

| Two-way ANOVA table results                            |                  |                                                        |                  |
|--------------------------------------------------------|------------------|--------------------------------------------------------|------------------|
|                                                        | DF               | F (DFn, Dfd)                                           | P value          |
| <b>Time x Column Factor</b>                            | 30               | F (30, 2065) = 3.372                                   | P<0.0001         |
| <b>Time</b>                                            | 5                | F (3,665, 1514) = 1.920                                | P=0.1109         |
| <b>Column Factor</b>                                   | 6                | F (6, 413) = 48.42                                     | P<0.0001         |
| <b>Subject</b>                                         | 413              | F (413, 2065) = 4.931                                  | P<0.0001         |
| <b>Residual</b>                                        | 2065             |                                                        |                  |
| Two-way ANOVA Tukey's Post-hoc Results                 |                  |                                                        |                  |
| Tukey's multiple comparisons test                      | Adjusted P Value | Tukey's multiple comparisons test                      | Adjusted P Value |
| <b>Time period: 0 -15 minutes</b>                      |                  | <b>Time period: 45 - 60 minutes</b>                    |                  |
| EM vs. 0.1 % DMSO                                      | 0.4063           | EM vs. 0.1 % DMSO                                      | >0.9999          |
| EM vs. 10 mM PTZ                                       | 0.0298           | EM vs. 10 mM PTZ                                       | <0.0001          |
| EM vs. 0.05 µm GS967 - pretreatment                    | 0.0016           | EM vs. 0.05 µm GS967 - pretreatment                    | 0.003            |
| EM vs. 0.05 µm GS967 acute                             | 0.3709           | EM vs. 0.05 µm GS967 acute                             | 0.0572           |
| EM vs. 0.05 µm GS967 - pretreatment                    | 0.9989           | EM vs. 0.05 µm GS967 - pretreatment                    | 0.638            |
| EM vs. 10 mM PTZ / 0.05 µm GS967 acute                 | 0.0192           | EM vs. 10 mM PTZ / 0.05 µm GS967 acute                 | 0.9644           |
| 10 mM PTZ vs. 10 mM PTZ / 0.05 µm GS967 - pretreatment | 0.0007           | 10 mM PTZ vs. 10 mM PTZ / 0.05 µm GS967 - pretreatment | 0.001            |
| 10 mM PTZ vs. 10 mM PTZ / 0.05 µm GS967 acute          | <0.0001          | 10 mM PTZ vs. 10 mM PTZ / 0.05 µm GS967 acute          | <0.0001          |
| <b>Time period: 15 - 30 minutes</b>                    |                  | <b>Time period: 60 - 75 minutes</b>                    |                  |
| EM vs. 0.1 % DMSO                                      | 0.995            | EM vs. 0.1 % DMSO                                      | 0.9993           |
| EM vs. 10 mM PTZ                                       | 0.031            | EM vs. 10 mM PTZ                                       | <0.0001          |
| EM vs. 0.05 µm GS967 - pretreatment                    | 0.0077           | EM vs. 0.05 µm GS967 - pretreatment                    | 0.0999           |
| EM vs. 0.05 µm GS967 acute                             | 0.0196           | EM vs. 0.05 µm GS967 acute                             | 0.0323           |
| EM vs. 0.05 µm GS967 - pretreatment                    | 0.9275           | EM vs. 0.05 µm GS967 - pretreatment                    | 0.0933           |
| EM vs. 10 mM PTZ / 0.05 µm GS967 acute                 | 0.9614           | EM vs. 10 mM PTZ / 0.05 µm GS967 acute                 | 0.0556           |
| 10 mM PTZ vs. 10 mM PTZ / 0.05 µm GS967 - pretreatment | 0.2035           | 10 mM PTZ vs. 10 mM PTZ / 0.05 µm GS967 - pretreatment | 0.0002           |
| 10 mM PTZ vs. 10 mM PTZ / 0.05 µm GS967 acute          | 0.0006           | 10 mM PTZ vs. 10 mM PTZ / 0.05 µm GS967 acute          | <0.0001          |
| <b>Time period: 30 - 45 minutes</b>                    |                  | <b>Time period: 75 - 90 minutes</b>                    |                  |
| EM vs. 0.1 % DMSO                                      | >0.9999          | EM vs. 0.1 % DMSO                                      | 0.9999           |
| EM vs. 10 mM PTZ                                       | <0.0001          | EM vs. 10 mM PTZ                                       | <0.0001          |
| EM vs. 0.05 µm GS967 - pretreatment                    | 0.0029           | EM vs. 0.05 µm GS967 - pretreatment                    | 0.0025           |
| EM vs. 0.05 µm GS967 acute                             | 0.0031           | EM vs. 0.05 µm GS967 acute                             | 0.0537           |
| EM vs. 0.05 µm GS967 - pretreatment                    | 0.3629           | EM vs. 0.05 µm GS967 - pretreatment                    | 0.0246           |
| EM vs. 10 mM PTZ / 0.05 µm GS967 acute                 | 0.9993           | EM vs. 10 mM PTZ / 0.05 µm GS967 acute                 | 0.0161           |
| 10 mM PTZ vs. 10 mM PTZ / 0.05 µm GS967 - pretreatment | 0.0162           | 10 mM PTZ vs. 10 mM PTZ / 0.05 µm GS967 - pretreatment | 0.0008           |
| 10 mM PTZ vs. 10 mM PTZ / 0.05 µm GS967 acute          | <0.0001          | 10 mM PTZ vs. 10 mM PTZ / 0.05 µm GS967 acute          | 0.0002           |
| One-way ANOVA table results                            |                  |                                                        |                  |
|                                                        | DF               | F (DFn, Dfd)                                           | P value          |
| <b>Treatment (between columns)</b>                     | 6                | F (DFn, Dfd)                                           | P value          |
| <b>Residual (within columns)</b>                       | 413              | F (6, 413) = 48.42                                     | P<0.0001         |
| <b>Total</b>                                           | 419              |                                                        |                  |
| One-way ANOVA Tukey's Post-hoc Results                 |                  |                                                        |                  |
| Tukey's multiple comparisons test                      | Adjusted P Value |                                                        |                  |
| EM vs. 0.1 % DMSO                                      | 0.9955           |                                                        |                  |
| EM vs. 10 mM PTZ                                       | <0.0001          |                                                        |                  |
| EM vs. 0.05 µm GS967 - pretreatment                    | 0.0025           |                                                        |                  |
| EM vs. 0.05 µm GS967 acute                             | 0.0234           |                                                        |                  |
| EM vs. 0.05 µm GS967 - pretreatment                    | 0.2294           |                                                        |                  |
| EM vs. 10 mM PTZ / 0.05 µm GS967 acute                 | >0.9999          |                                                        |                  |
| 10 mM PTZ vs. 10 mM PTZ / 0.05 µm GS967 - pretreatment | <0.0001          |                                                        |                  |
| 10 mM PTZ vs. 10 mM PTZ / 0.05 µm GS967 acute          | <0.0001          |                                                        |                  |
