# Supplementary material for: Neural Activity Correlates With Behavior Effects of Anti-Seizure Drugs Efficacy Using the Zebrafish Pentylenetetrazol Seizure Model
Source: PubMed Central journal article supplement (PMC9041662; doi:10.3389/fphar.2022.836573), 2022-04-12
Supplement: Table7.pdf [file Table7.pdf]

***Supplemental Data***

***Milder, Zybura, Cummins and Marrs***

***Neural Activity Correlates with Behavior Effects of Anti-Seizure Drugs Efficacy Using the Zebrafish Pentylentetrazol Seizure Model***

**Table S7. Statistical Results for Relative Midbrain EEG Activity**

The table displays the results of the one-way ANOVA (Fig 7B) performed for Figure 7B and the resulting post-hoc Tukey comparisons and accompanying p-values for groups marked for significance within the Figure 7 graph.

**Table S7: Statistical Results for Relative Midbrain EEG Activity**

| One-way ANOVA table results            |                  |                   |          |
|----------------------------------------|------------------|-------------------|----------|
|                                        | DF               | F (DFn, DFd)      | P value  |
| Treatment (between columns)            | 7                | F (7, 56) = 10.74 | P<0.0001 |
| Residual (within columns)              | 56               |                   |          |
| Total                                  | 63               |                   |          |
| One-way ANOVA Tukey's Post-hoc Results |                  |                   |          |
| Tukey's multiple comparisons test      | Adjusted P Value |                   |          |
| EM vs. 0.1 % DMSO                      | 0.9997           |                   |          |
| EM vs. 10 mM PTZ                       | <0.0001          |                   |          |
| EM vs. 10 mM PTZ / 100 µM CBZ          | >0.9999          |                   |          |
| EM vs. 10 mM PTZ / 200 µM TPR          | 0.9657           |                   |          |
| EM vs. 10 mM PTZ / 100 µM LTG          | 0.9965           |                   |          |
| EM vs. 10 mM PTZ / 0.05 µM GS967       | >0.9999          |                   |          |
| EM vs. EM-15                           | >0.9999          |                   |          |
